# Supplementary material for: Facile morphology control of 3D porous CeO2 for CO oxidation
Source: Royal Society of Chemistry journal article supplement (doi:10.1039/c8ra03555e), 2018-01-01
Supplement: c8ra03555e1.pdf [file c8ra03555e1.pdf]

## Supporting Information

### Facile morphology control of 3D porous CeO<sub>2</sub> for CO oxidation

*Xia Jiang, Xiaochun Huang, Wei Zeng, Jiale Huang, Yanmei Zheng, Daohua Sun\*  
and Qingbiao Li\**

Department of Chemical and Biochemical Engineering, College of Chemistry and  
Chemical Engineering, Xiamen University, Xiamen, 361005, PR China.

\*Correspondence authors: [sdaohua@xmu.edu.cn](mailto:sdaohua@xmu.edu.cn); [kelqb@xmu.edu.cn](mailto:kelqb@xmu.edu.cn)

Pages: S1-S3, Figures: S1-S7, Tables: S1

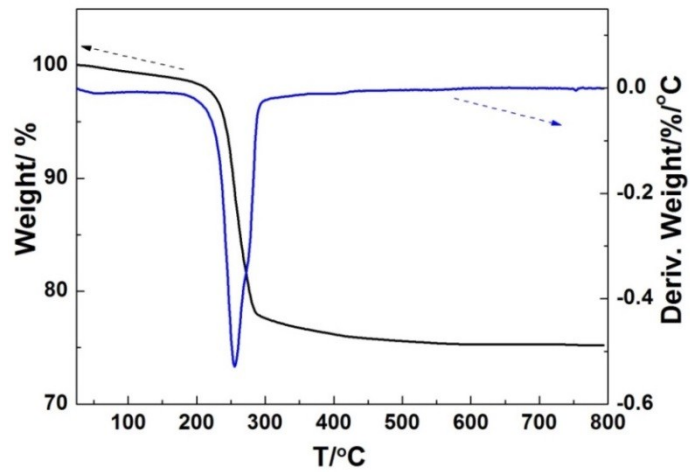

Fig. S1. The TG and DTG of A-CeO<sub>2</sub> (3:2:1).

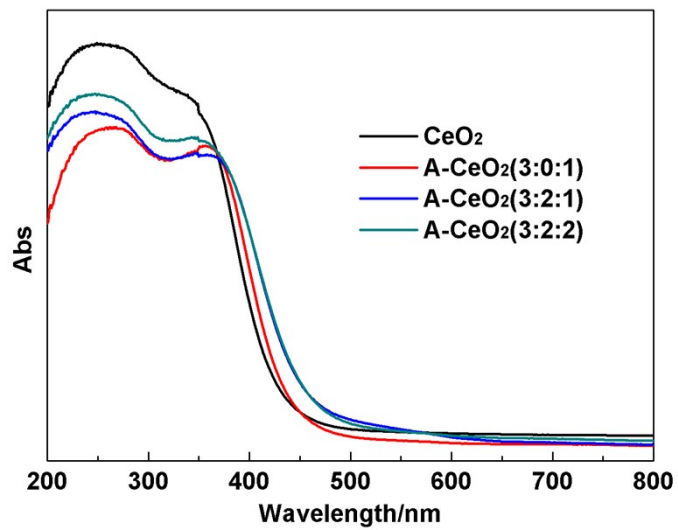

Fig. S2. UV-vis diffuse reflectance spectra of A-CeO<sub>2</sub> (3:2:1)

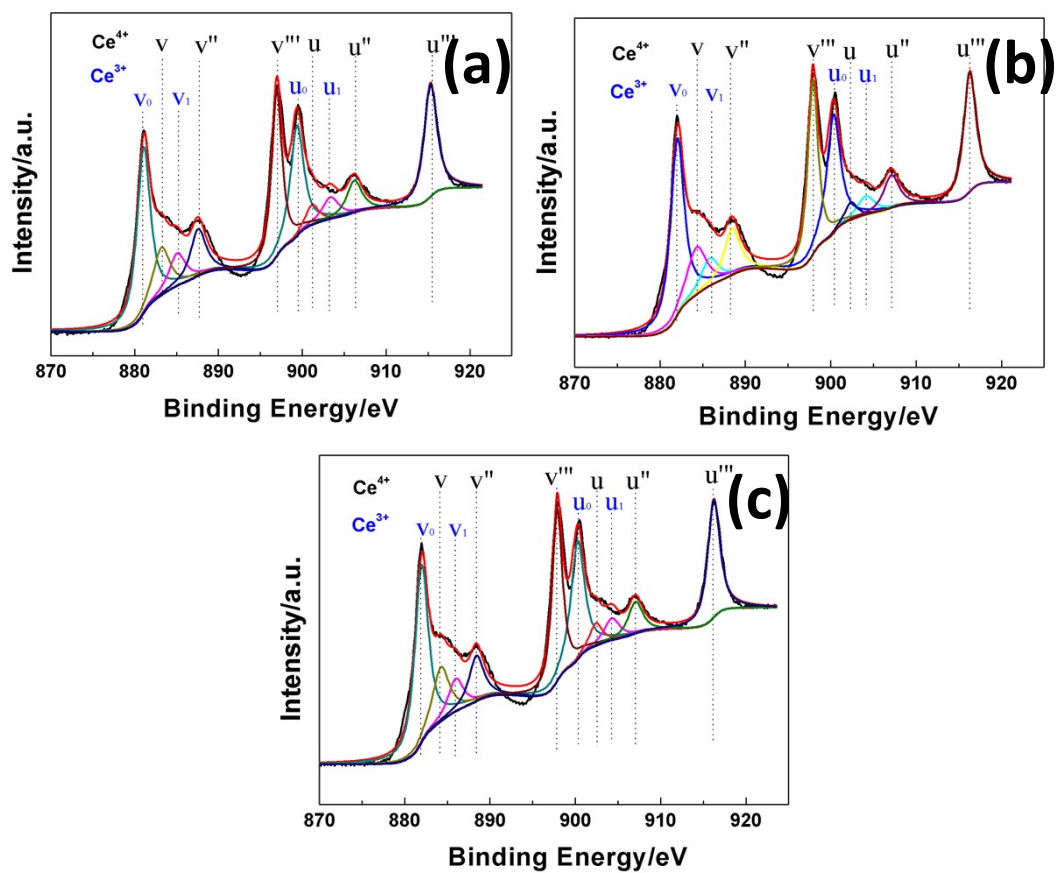

Fig. S3. Ce 3d core level XPS pattern of CeO<sub>2</sub> (a), A-CeO<sub>2</sub> (3:0:1) (b) and A-CeO<sub>2</sub> (3:2:2).

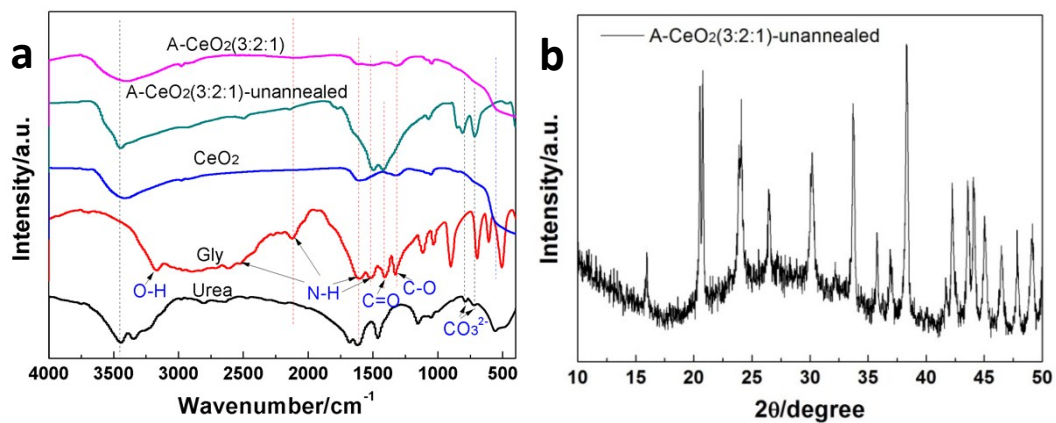

Fig. S4. FTIR spectra of reactants and CeO<sub>2</sub> (a); XRD patterns of A-CeO<sub>2</sub> (3:2:1) without calcination (b)

**Table S1**The yield of A-CeO<sub>2</sub> with different ratio of reactants

| Sample                       | Theoretical mass/g | Actual mass/g | yield/% |
|------------------------------|--------------------|---------------|---------|
| A-CeO <sub>2</sub> (3:0:1)   | 1.39               | 1.13          | 81.29   |
| A-CeO <sub>2</sub> (3:1:1)   | 1.39               | 0.72          | 51.80   |
| A-CeO <sub>2</sub> (3:2:1)   | 1.39               | 0.38          | 27.34   |
| A-CeO <sub>2</sub> (3:4:1)   | 1.39               | 0.07          | 5.04    |
| A-CeO <sub>2</sub> (1.5:2:1) | 1.39               | 0.06          | 4.32    |
| A-CeO <sub>2</sub> (6:2:1)   | 1.39               | 0.87          | 62.59   |
| A-CeO <sub>2</sub> (3:2:2)   | 2.78               | 0.37          | 13.31   |

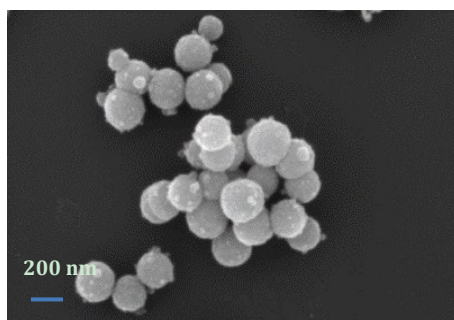**Fig. S5.** SEM images of A-CeO<sub>2</sub> (3:2:1) with different solvent (ethanol: water=1:10).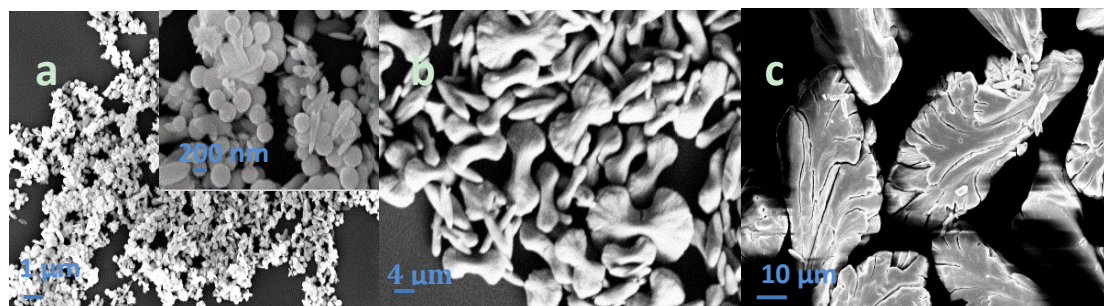**Fig. S6.** SEM images of A-CeO<sub>2</sub> (3:2:1) with different reaction time (a: 6 h; b: 12 h; c: 24 h).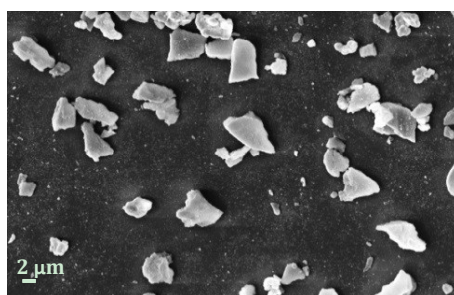**Fig. S7.** SEM of bulk CeO<sub>2</sub>.
